# Supplementary material for: Molecular mechanisms of Tetranychus urticae chemical adaptation in hop fields
Source: PubMed Central journal article supplement (PMC4664861; doi:10.1038/srep17090), 2015-12-01
Supplement: srep17090-s1.pdf [file srep17090-s1.pdf]

## **Supplementary material**

**Title:** Molecular mechanisms of *Tetranychus urticae* chemical adaptation in hop fields

**Author names:** Tara G. Piraneo, Jon Bull, Mariany D. Morales, Laura C. Lavine, Douglas B. Walsh, Fang Zhu<sup>\*</sup>

Supplementary Figure 1. The amino acid substitutions response for abamectin resistance in *T. urticae* and the primer design strategy for TuGlu1 and TuGlu3. TM: transmembran region.

Supplementary Figure 2. The 3D structure for *T. urticae* cytochrome *b* showing amino acid substitutions related to bifentazate resistance. The protein tertiary structure of *T. urticae* cytochrome *b* was predicted by using the I-TASSER server (<http://zhanglab.ccmb.med.umich.edu/I-TASSER/>) and then the PDB coordinate file of the highest ranking model was loaded into Chimera (<http://plato.cgl.ucsf.edu/chimera/docs/credits.html>) for molecular visualization and modification.

Supplementary Figure 3. The structure of sodium channel and tested amino acid substitutions in current study. Mutations labelled with white circles denote that these mutations have been examined in *Xenopus* oocytes and the function in pyrethroid resistance had been confirmed. Mutations labelled with black circles stand for having not been investigated in *Xenopus* oocytes.

Fig. S1

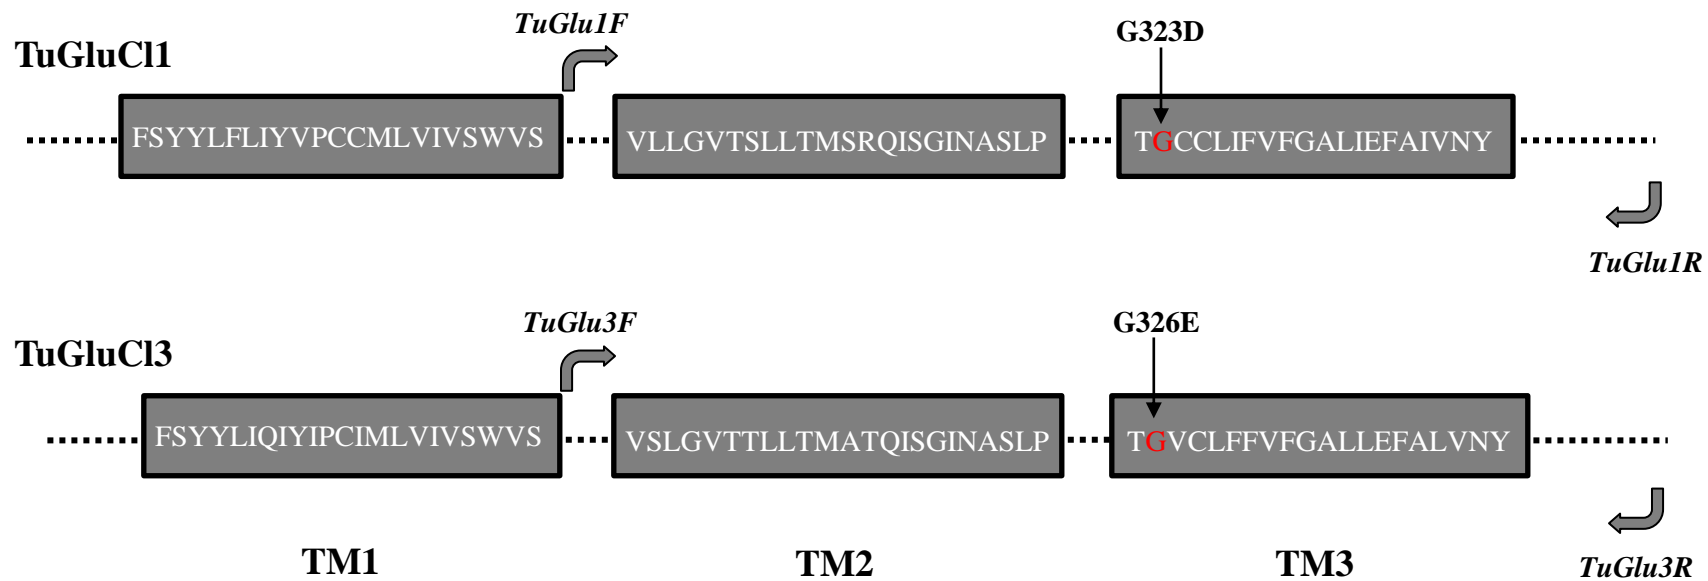

Fig. S2

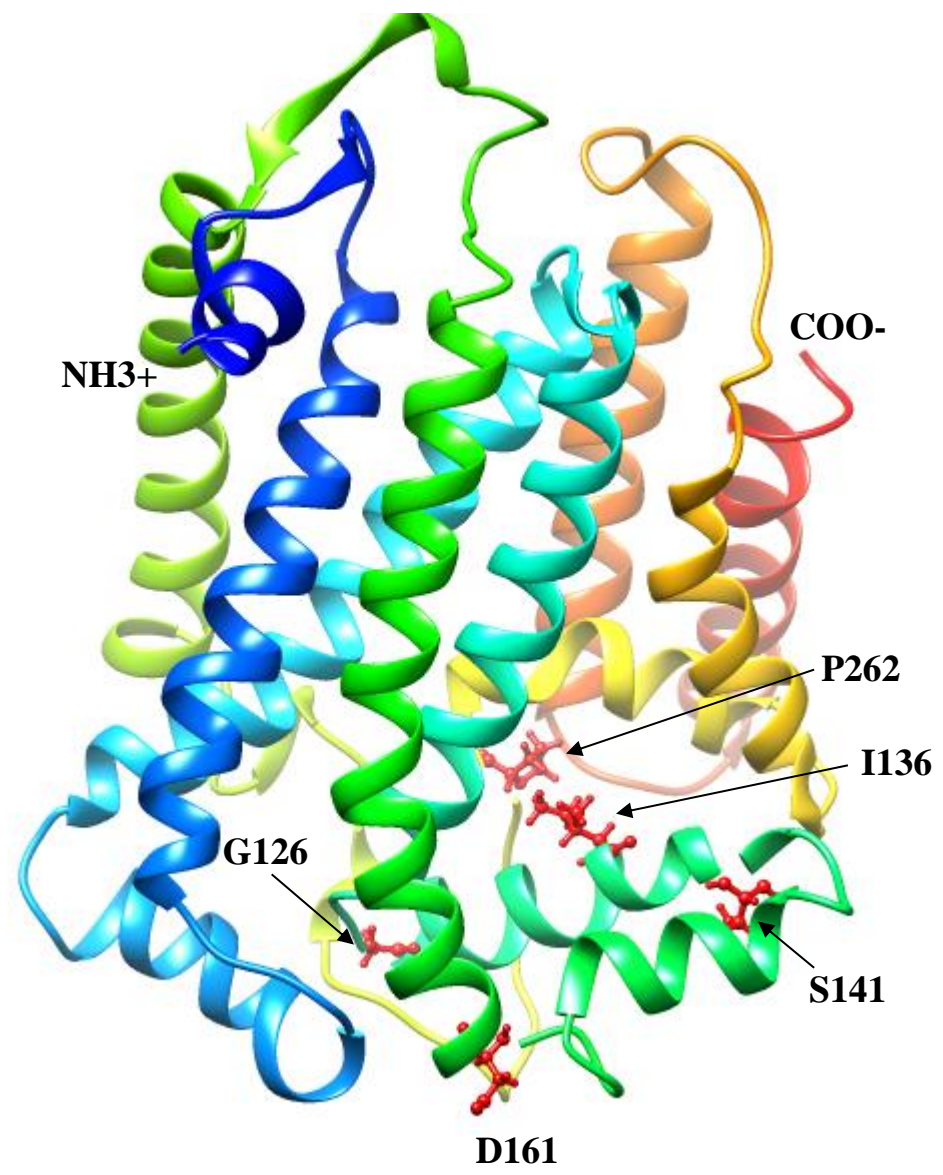

Fig. S3

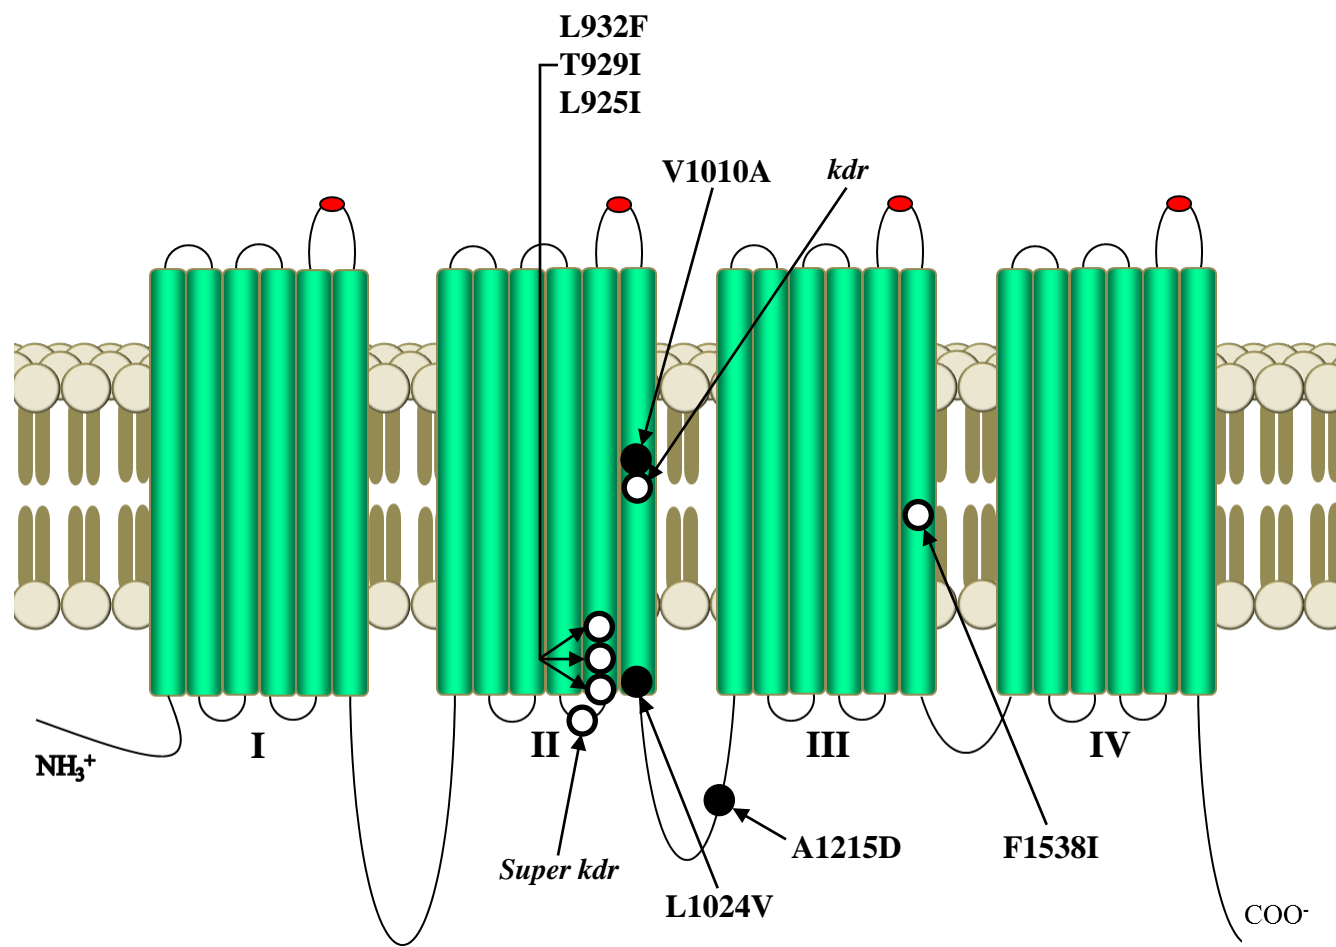

Supplementary Table S1. Primer information for PCR and qRT-PCR analyses

| Primer name | Gene name            | Gene ID       | Primer sequence (5' → 3')         | Amplicon (bp) | Annealing T. (°C) | Reference                                  |
|-------------|----------------------|---------------|-----------------------------------|---------------|-------------------|--------------------------------------------|
| KdrIIF1     | voltage-gated        | JN881331      | F: GAAGGTGTTTCGAGGTCTTTTCAG       | 506           | 55.4              | This study                                 |
| KdrIIR1     | sodium channel       |               | R: AAGCGATCAAAGGCTTCTTGAAG        |               | 55.8              |                                            |
| KdrIIF2     | voltage-gated        | JN881331      | F: GTTCGAGGTCTTTTCAGTTTACG        | 489           | 53.9              | This study                                 |
| KdrIIR2     | sodium channel       |               | R: GGCTTCTTGAAGTTTCTTGGTG         |               | 54.4              |                                            |
| KdrII-IIIIF | voltage-gated        | JN881331      | F: TGCATCTCAATTGTCCAAGG           | 255           | 53.0              | <i>Pest Manag. Sci.</i> 67:1424-1433       |
| KdrII-IIIR  | sodium channel       |               | R: GTTCTTCCAGGCAACATGG            |               | 54.3              |                                            |
| KdrIIIF1    | voltage-gated        | JN881331      | F: TGGACAATTATTATGGACCATGC        | 1,549         | 53.2              | This study                                 |
| KdrIIIR1    | sodium channel       |               | R: ATGATGGCAGCCAATACACC           |               | 55.5              |                                            |
| KdrIIIF1    | voltage-gated        | JN881331      | F: TGGACAATTATTATGGACCATGC        | 259           | 53.2              | This study                                 |
| KdrIIIR2    | sodium channel       |               | R: GTTCTTTGATCCCATCTTTTTCAT       |               | 52.3              |                                            |
| TuGlu1F     | glutamate-gated      | AGN53343      | F: TTGGATTGACCCTAACTCAGCAG        | 266           | 56.8              | <i>Insect Biochem Mol Biol.</i> 42:455-465 |
| TuGlu1R     | chloride channel 1   |               | R: TTGCACCAACAATTCCTTGAGG         |               | 56.1              |                                            |
| TuGlu3F     | glutamate-gated      | AFG29908      | F: CATTITGGTTGGATCCAAATGCTATTCC   | 267           | 57.0              | This study                                 |
| TuGlu3R     | chloride channel 3   |               | R: GTTGAACCTTGCTGTTGTTGATTTTCTGCG |               | 59.3              |                                            |
| CytbF1      | cytochrome b         | EU556749      | F: CGGAATAATTTTACAAATAACT         | 828           | 51.7              | <i>PNAS</i> 105 (16): 5980-5985            |
| CytbR1      |                      |               | R: AATGAAATTTCTGTAAAAGGG          |               | 50.4              |                                            |
| CytbF1      | cytochrome b         | EU556749      | F: CGGAATAATTTTACAAATAACT         | 637           | 51.7              | <i>PNAS</i> 105 (16): 5980-5985            |
| CytbR2      |                      |               | R: TGGTACAGATCGTAGAATTGC          |               | 54.6              |                                            |
| TuCYP385C4F | CYP385C4             | tetur11g06630 | F: CGTAAACGATCGTTCTGGGAAC         | 105           | 55.8              | This study                                 |
| TuCYP385C4R |                      |               | R: TTTCGGTTTAGGTTTCGGTGAAC        |               | 55.7              |                                            |
| TuCYP389A1F | CYP389A1             | tetur25g02050 | F: GTTCCTTCTATTTGGCCATGCG         | 135           | 56.8              | This study                                 |
| TuCYP389A1R |                      |               | R: TGATCCAGATGGCAAAATAAACCCG      |               | 57.5              |                                            |
| TuCYP392D8F | CYP392D8             | tetur03g05070 | F: CTCGATCATTTC AACGTAAGCCC       | 122           | 56.0              | This study                                 |
| TuCYP392D8R |                      |               | R: CATGGGCCAGAAGGGAGTTTAC         |               | 57.8              |                                            |
| TuRp49F     | ribosomal protein 49 | tetur18g03590 | F: CTTCAAGCGGCATCAGAGC            | 105           | 56.6              | This study                                 |
| TuRp49R     |                      |               | R: CGCATCTGACCCTTGAACCTC          |               | 56.0              |                                            |
| TuActinF    | actin                | tetur03g09480 | F: ATGCCATCCTTCGTTTGGATTTGG       | 111           | 58.2              | This study                                 |
| TuActinR    |                      |               | R: GGACAATTTCTCGCTCAGCAGTGG       |               | 58.2              |                                            |
